# Supplementary material for: MEK1 signaling promotes self-renewal and tumorigenicity of liver cancer stem cells via maintaining SIRT1 protein stabilization
Source: PubMed Central journal article supplement (PMC4991478; doi:10.18632/oncotarget.7972), 2016-03-07
Supplement: oncotarget-07-20597-s001.pdf [file oncotarget-07-20597-s001.pdf]

## MEK1 signaling promotes self-renewal and tumorigenicity of liver cancer stem cells via maintaining SIRT1 protein stabilization

### Supplementary Materials

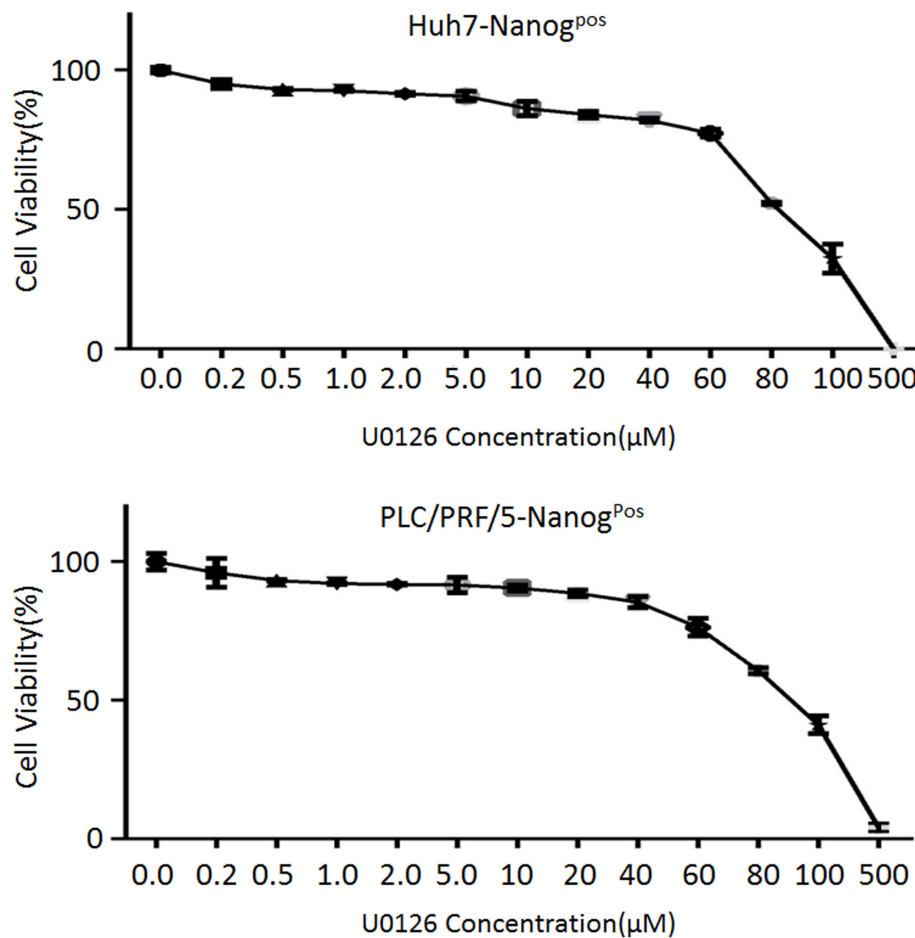

**Supplementary Figure S1: Toxicity test of U0126 to liver CSCs.** CSCs (Huh7- and PLC/PRF/5- Nanog<sup>pos</sup> cells) were treated with indicated concentration of U0126 for 24 hours, before being analyzed with the CCK8 assay.

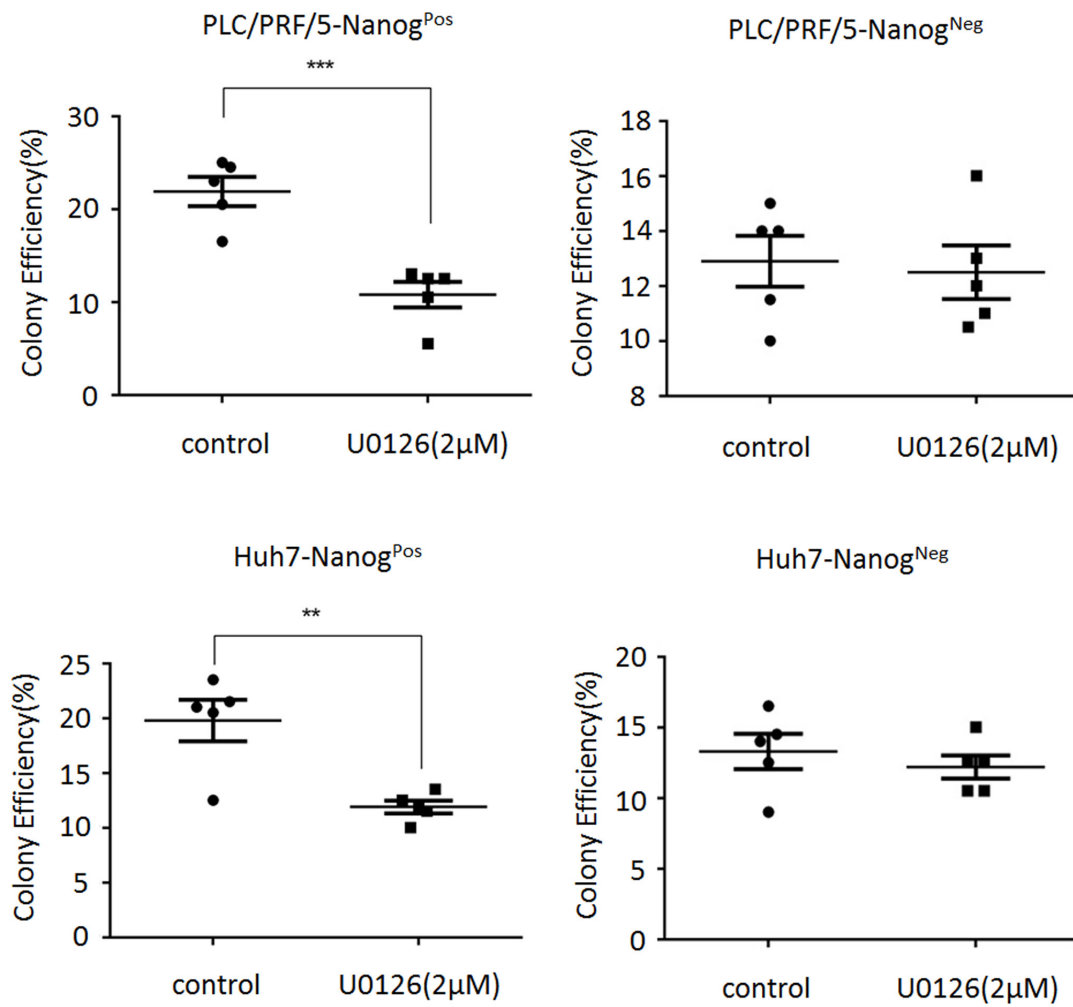

**Supplementary Figure S2: U0126 inhibited CSCs and non-CSCs discrepantly in Colony capacity.** CSCs and non-CSCs were treated with 2 µM U0126 for 14 days and stained with crystal violet.

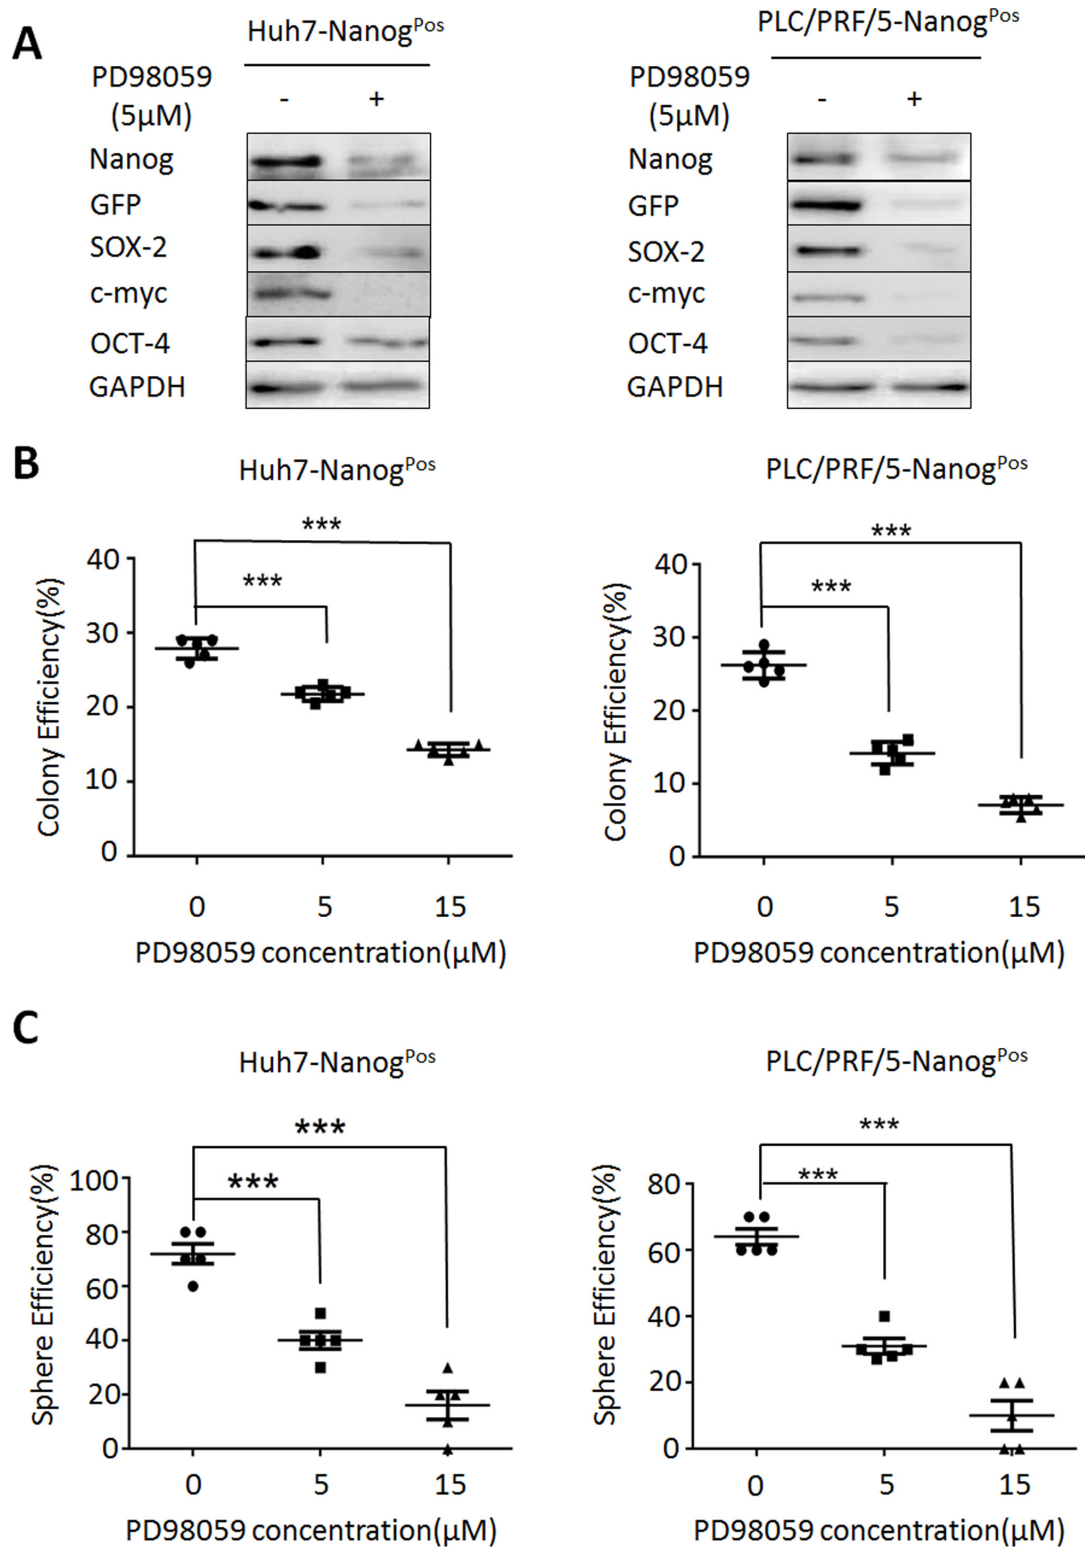

**Supplementary Figure S3: PD98059 significantly inhibited CSCs self-renewal and tumorigenesis.** (A) Proteins were obtained after 5 μM PD98059 treatment of CSCs for 48 hours. Western blots analysis of Nanog, GFP, SOX2, OCT4 and c-myc expression level compared with negative control. (B) CSCs were co-cultured with indicate dose of PD98059 for 14 days before stained with crystal violet and counted. (C) CSCs were treated with 5 μM or 15 μM PD98059 in non-adhesion system for 7 days before counted.

**A**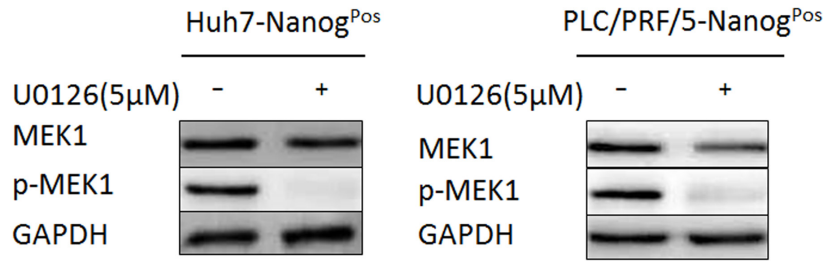**B**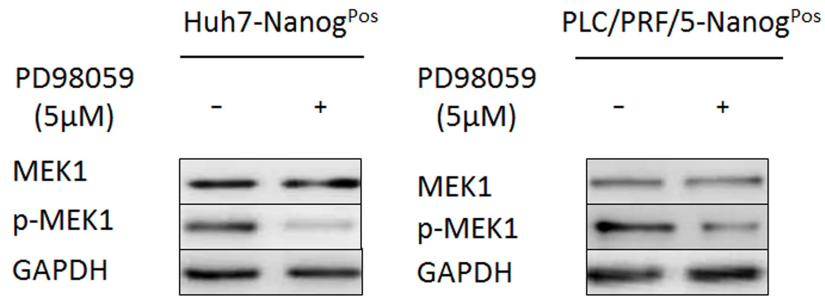

**Supplementary Figure S4: MEK1 inhibitor inhibited phosphorylated-MEK1 expression.** (A–B) CSCs (Huh7- and PLC/PRF/5-Nanog<sup>Pos</sup> cells) were treated with 5 µM U0126 or 5 µM PD98059 for 48 hours. Cells were harvested and analysis by western blots about the expression of MEK1 and phosphorylated-MEK1.

## Detail of Antibody

| Name            | Company                   | Catalog Number | Dilutions                                |
|-----------------|---------------------------|----------------|------------------------------------------|
| SOX2            | Cell Signaling Technology | 2748           | 1:1000 for WB                            |
| MEK1            | Cell Signaling Technology | 12671          | 1:500 for WB                             |
| phospho-MEK1    | Cell Signaling Technology | 2338           | 1:500 for WB, 1:50 for IHC               |
| GAPDH           | Cell Signaling Technology | 2118L          | 1:1000 for WB                            |
| Ki-67           | Cell Signaling Technology | 9449           | 1:800 for IF                             |
| SIRT1 (H-300)   | Santa Cruz                | sc-15404       | 1:500 for WB, 1:200 for IP, 1:50 for IHC |
| c-Myc (9E10)    | Santa Cruz                | sc-40          | 1:500 for WB                             |
| Ub              | Santa Cruz                | sc-8017        | 1:500 for WB, 1:300 for IP               |
| GFP             | abcam                     | ab290          | 1:1000 for WB                            |
| OCT4            | abcam                     | ab19857        | 1:1000 for WB                            |
| Nanog           | abcam                     | ab109250       | 1:1000 for WB, 1:100 for IHC             |
| ERK1/2          | Millipore                 | 05-1152        | 1:1000 for WB                            |
| Phospho-ERK1/2  | Millipore                 | 05-797R        | 1:1000 for WB                            |
| Alexa Flour 647 | life technologies         | A31571         | 1:1000 for IF                            |
